# Supplementary material
Source: Springer Nature journal article supplement (https://www.springermedizin.de/resource/supplementary/12889_2007_1165_MOESM2_ESM.pdf/9502594)

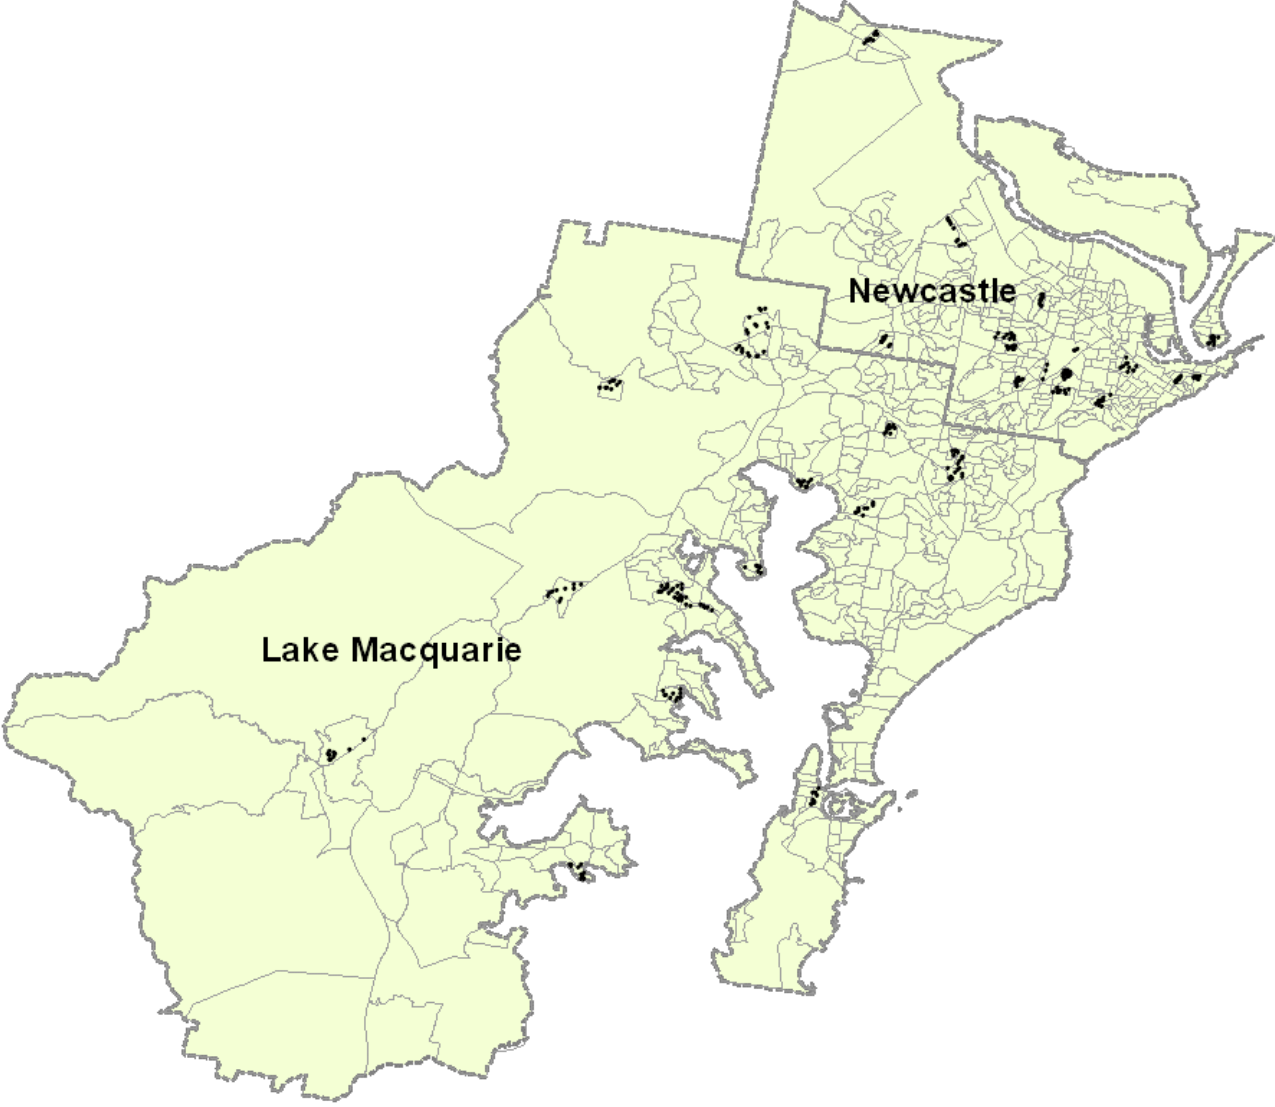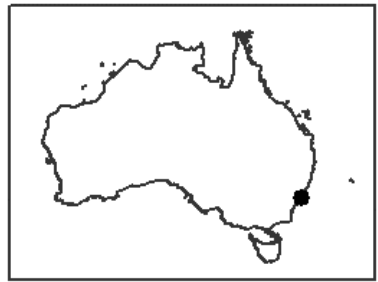

- Surveyed households
- Collection district boundary
- Local government boundary

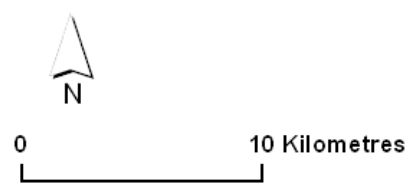

Supplement: MOESM2 [file 9502594]
